# Supplementary material
Source: Springer Nature journal article supplement (https://www.springermedizin.de/resource/supplementary/12995_2010_127_MOESM3_ESM.pdf/9622792)

▨ cranial cervical vertebrae    ■ middle/caudal cervical vertebrae    ▨ upper thoracal vertebrae

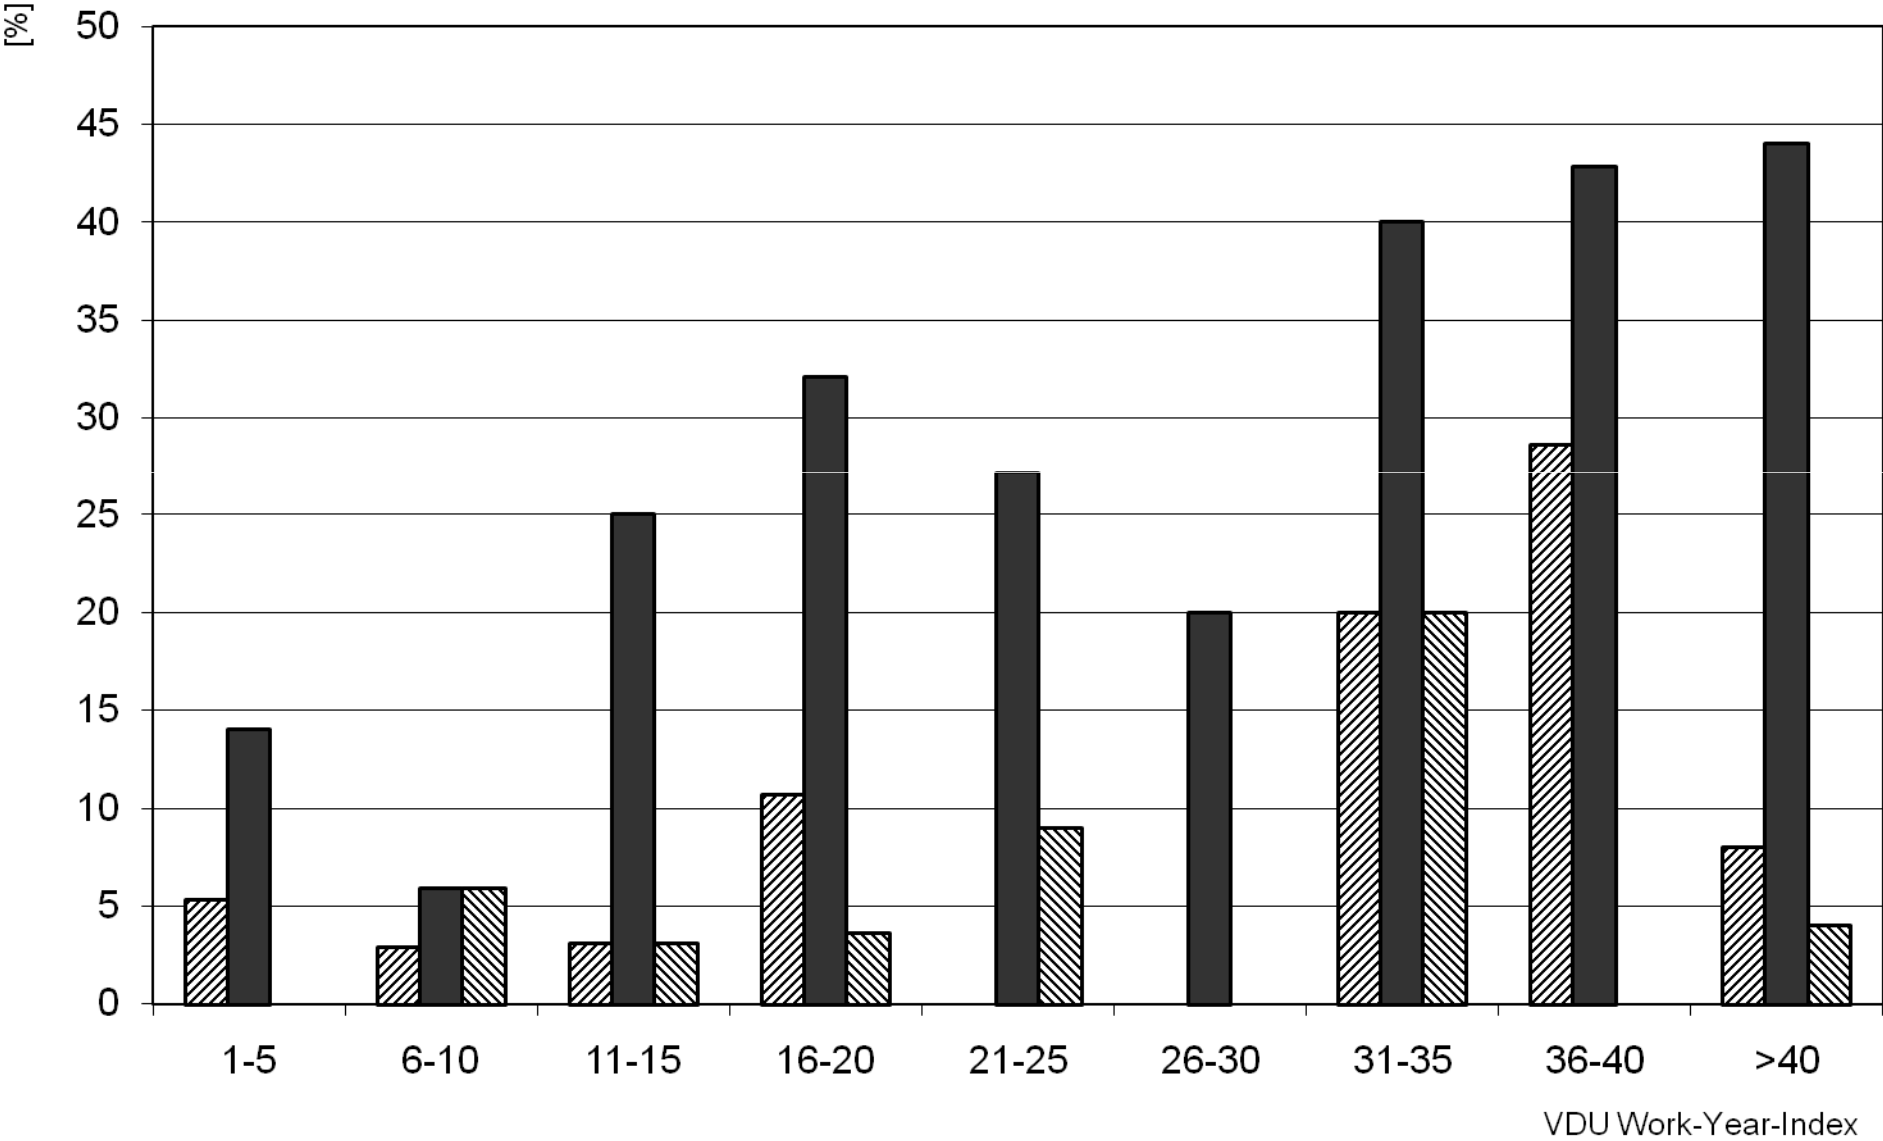

Supplement: MOESM3 [file 9622792]
